# Supplementary material
Source: Springer Nature journal article supplement (https://www.springermedizin.de/resource/supplementary/12885_2001_10_MOESM5_ESM.pdf/9460004)

**LoVo**

**DLD-1**

0

15

39

0

27

58

(PDL)

(kbp)

23.13

9.42

6.56

4.36

2.32

2.02

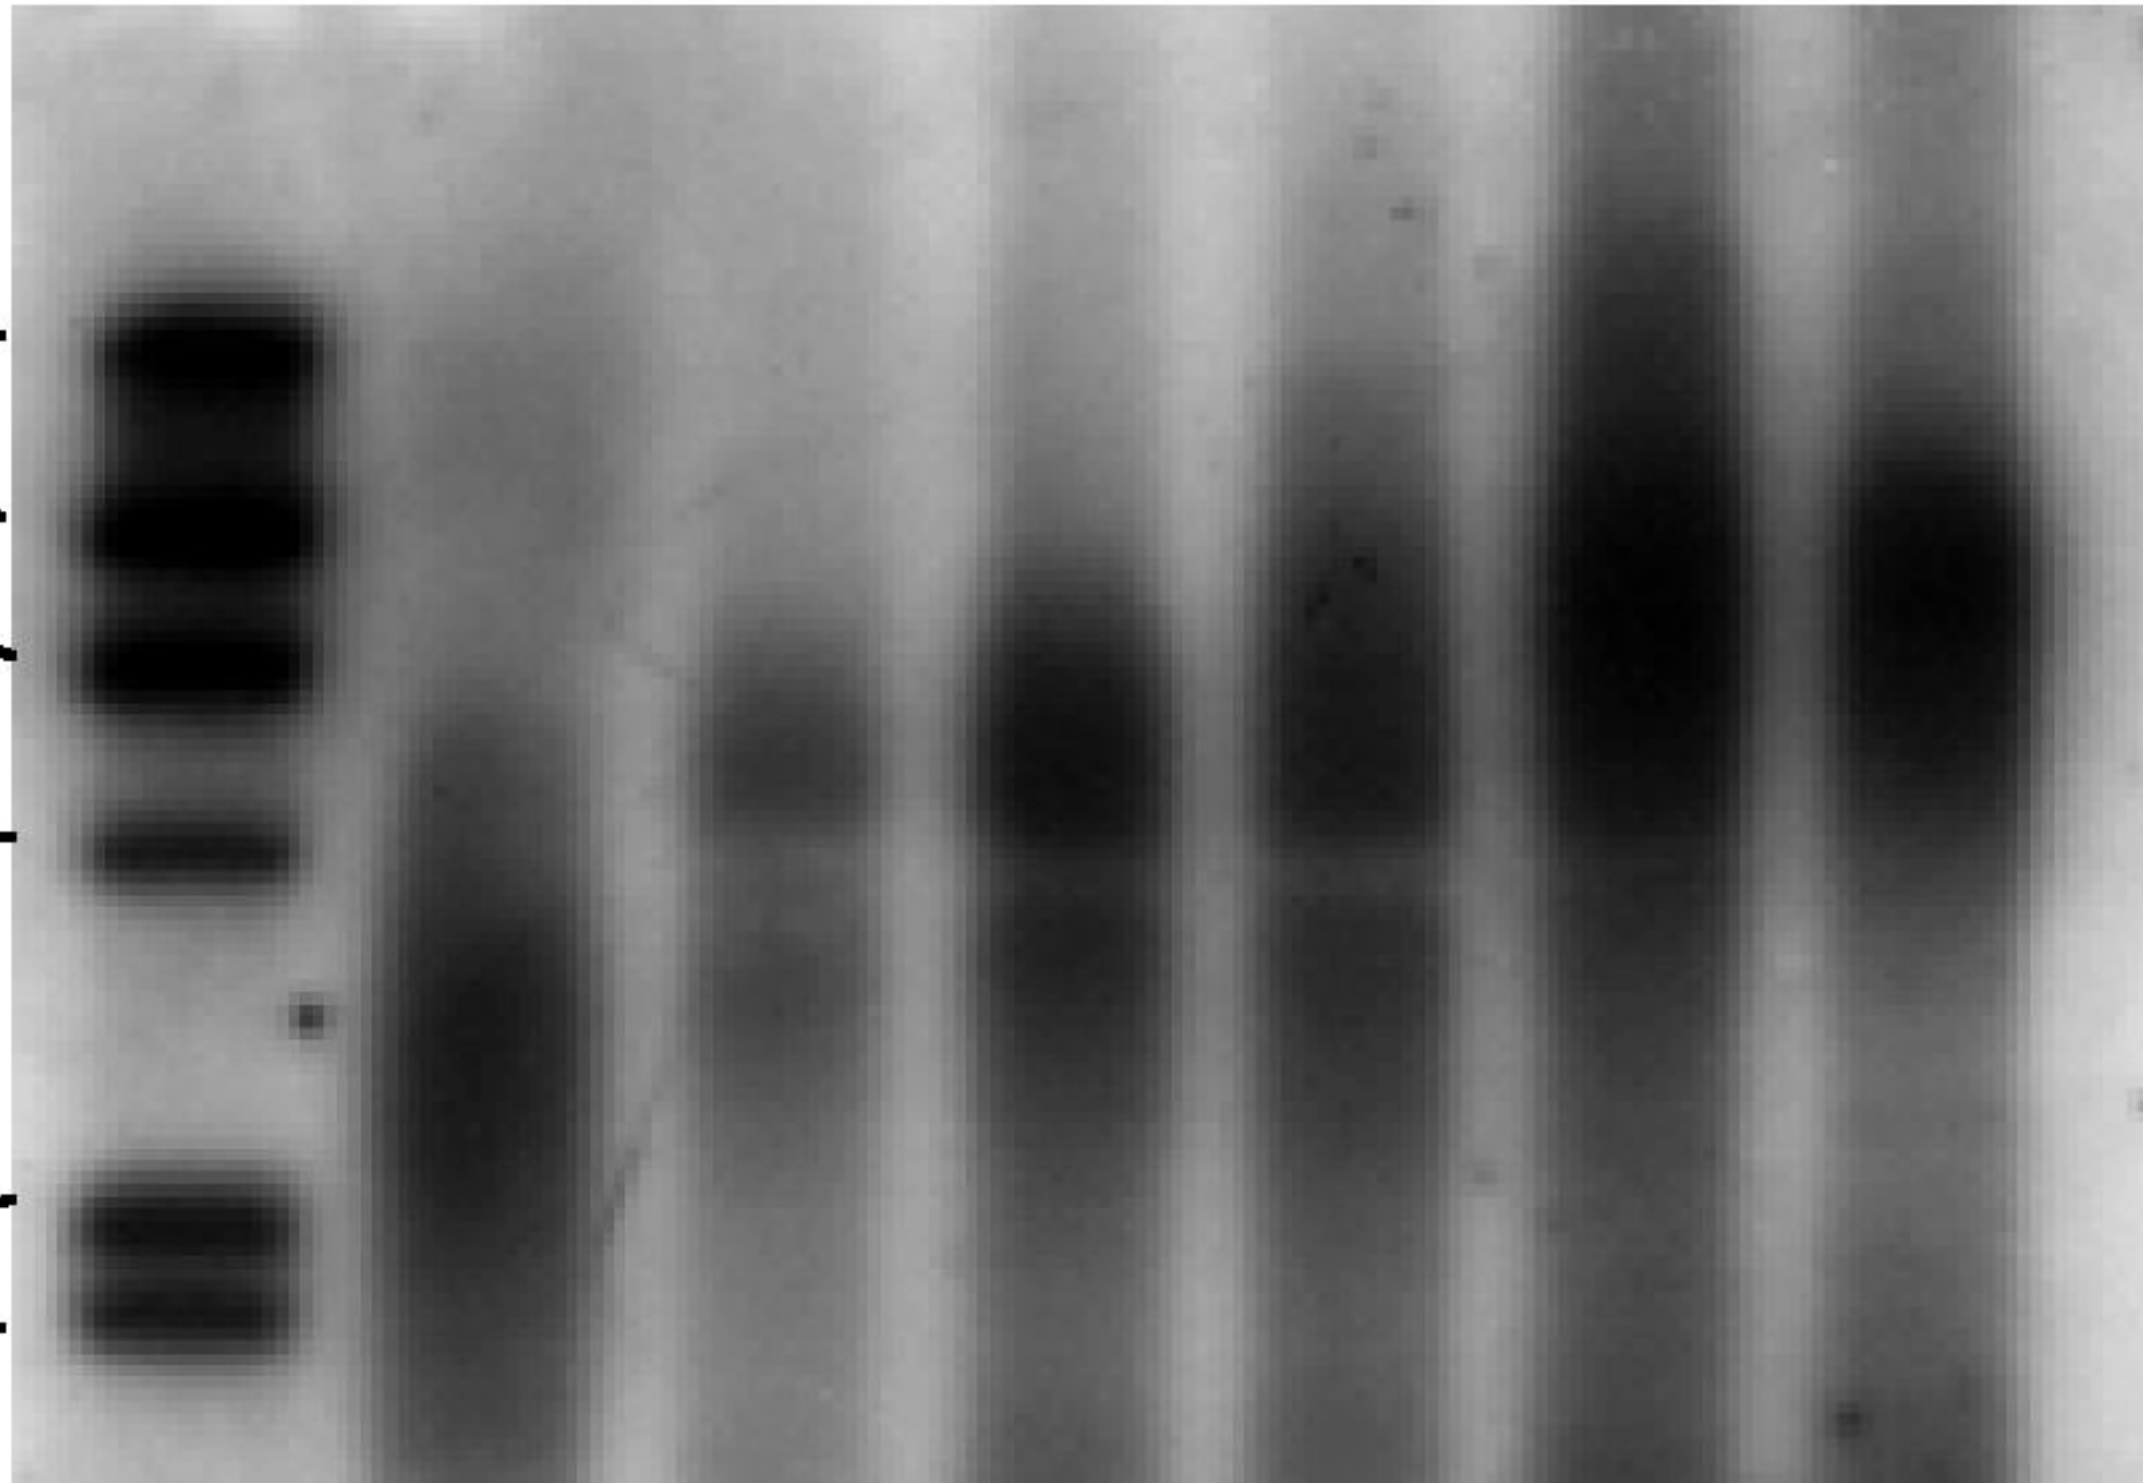

2.83

4.62

5.48

5.99

7.96

9.30

Peak TRF

2.80

4.19

5.28

5.74

8.67

8.25

Mean TRF  
(kbp)

Supplement: MOESM5 [file 9460004]
